# Supplementary material
Source: publisher figshare collection journal article supplement (https://karger.figshare.com/ndownloader/files/27788595)
Supplement: Supplementary file 1 [file 27788595]

**Figure legends**

Supplementary Figure 1: Risk of bias summary: review authors' judgements about each risk of bias item for each included study

Supplementary Figure 2a-2d: Forest plot showing subgroup analysis based on surgical versus mixed patients

Supplementary Figure 3a-3d: Forest plot showing subgroup analysis based on severity of illness

Supplementary Figure 4a-4d: Forest plot showing subgroup analysis based on modality of renal replacement therapy

Supplementary Figure 5a-5d: Funnel plot

Supplementary Figure 6a-6b: Subgroup analysis based on types of trial (multicenter single center
